# Supplementary material
Source: PubMed Central journal article supplement (PMC7772590)
Supplement: mmc1.pdf [file mmc1.pdf]

# Pattern of acute MI admissions in India during COVID era: A Cardiological Society of India study

## Proforma

Patient ID:

Age (yrs):  Sex: M / F Hospital ID: -----

Name of the cardiologist in charge: -----

Test for COVID done?: Yes / No COVID positive: Yes / No

DOA:  DOD: (death)

D D M M Y Y Y Y

D D M M Y Y Y Y

Type of MI: STEMI / NSTEMI Coronary angiography: Yes / No

PTCA done: Yes / No CABG: Yes / No

Cardiogenic shock: Yes / No Heart failure in hospital: Yes / No

Mechanical complications (MR , VSR or rupture): Yes / No

Malignant ventricular arrhythmias: Yes / No

LV EF (%):  In hospital mortality: Yes / No

For STEMI only

Site of MI: AW / IW/ Others

Primary PTCA / Thrombolysis / No reperfusion treatment / Rescue PTCA

Time from symptom onset to primary PTCA / thrombolysis: (mts)

Door to balloon time (mts):  Door to needle time (mts):

If thrombolysis, agent: TNK / SK/ Others

If no reperfusion treatment, reasons: late presentation / contra-  
indications for thrombolysis / no facility for lysis or PTCA/ others

If late presentation, duration: 12 – 24 h / 24 – 48 h / > 48 h

Data filled by : -----

Signature: -----
